# Supplementary material
Source: publisher figshare collection journal article supplement (https://frontiersin.figshare.com/ndownloader/files/22815899)
Supplement: Supplementary file [file 22815899]

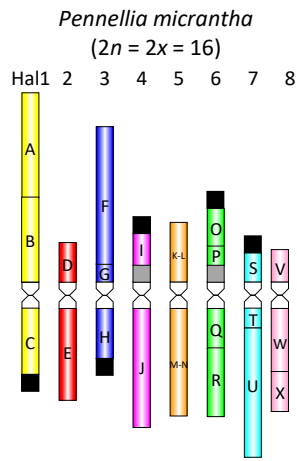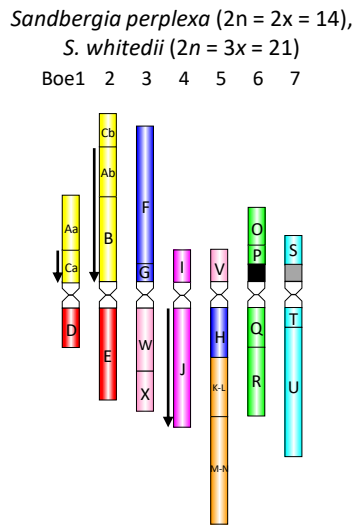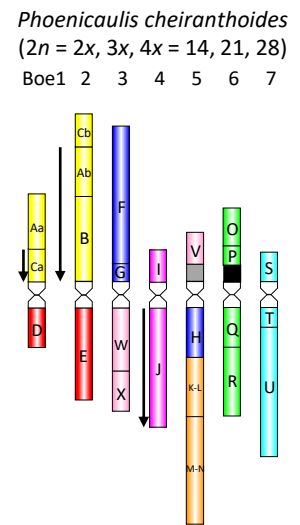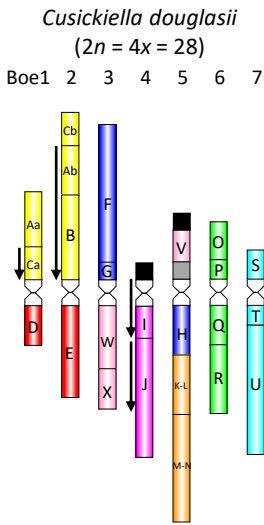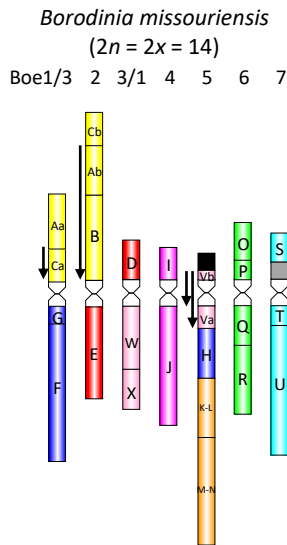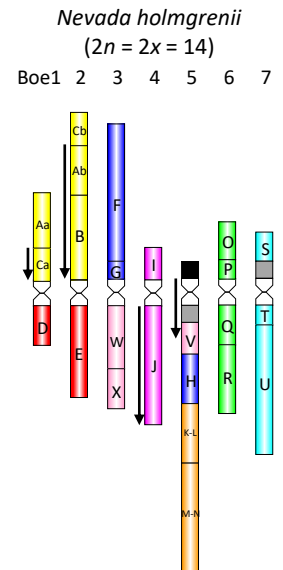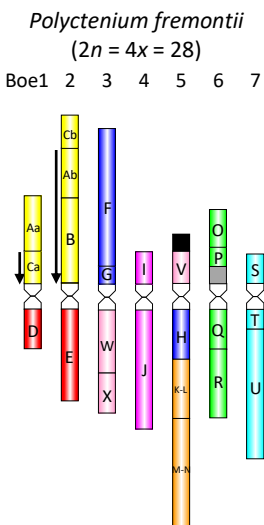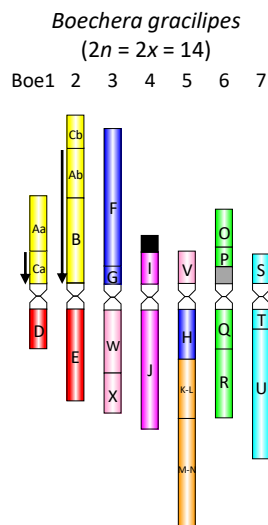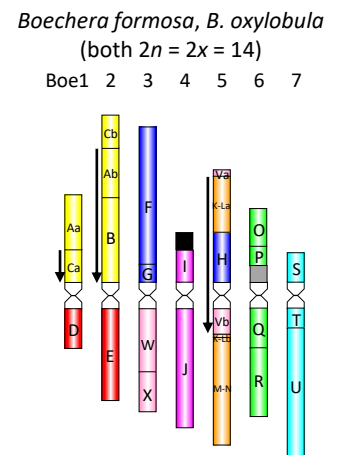

**Supplementary Figure S1.** Chromosomal position of 5S and 35S rDNA loci in karyotypes of Boechereae and Halimolobeae species analyzed. Color coding of 22 genomic blocks (GBs A to X) reflects their position on the eight ancestral chromosomes (AK1 to AK8) in the Ancestral Crucifer Karyotype. Blocks split into two segments are labeled as “a” and “b”. Downward-pointing arrows denote the inverse orientation of GBs compared to their position in the ACK represented here by the *Pennellia micrantha* genome. Grey squares: 5S rDNA loci, black squares: 35S rDNA loci.
